# Supplementary material for: Systematic Annotation Reveals CEP Function in Tomato Root Development and Abiotic Stress Response
Source: MDPI journal article supplement (doi:10.3390/cells11192935), 2022-09-20
Supplement: s1 [file s1]

**Table S1. Summary of the identified 17 *SICEP* genes**

| Gene name      | Locus ID       | Chromosome localization         | Genomic sequence (bp) | CDS sequence (bp) | Transcript sequence (bp) | Protein sequence (AA) | Molecular weight (DA) | PI   | CEP Motif (15AA)                                      |
|----------------|----------------|---------------------------------|-----------------------|-------------------|--------------------------|-----------------------|-----------------------|------|-------------------------------------------------------|
| <i>SICEP1</i>  | Solyc01g107570 | ch01: 87387917-87388172 forward | 255                   | 255               | 255                      | 85                    | 9372.84               | 8.22 | NVVVKNSGPSPGIGH                                       |
| <i>SICEP2</i>  | Solyc02g065040 | ch02: 34178842-34179079 reverse | 237                   | 237               | 237                      | 79                    | 8700.95               | 6.82 | PSPGHVDGHSPGIGH                                       |
| <i>SICEP3</i>  | Solyc02g087020 | ch02:47583756-47583996 reverse  | 240                   | 240               | 240                      | 80                    | 8639.74               | 8.81 | LTEAKNSGPSPGEGH                                       |
| <i>SICEP4</i>  | Solyc02g090590 | ch02:50187107-50187356 reverse  | 249                   | 249               | 249                      | 83                    | 9090.54               | 9.6  | VDAFSSPGHSPGIGH                                       |
| <i>SICEP5</i>  | Solyc02g090600 | ch02:50192522-50193044 reverse  | 522                   | 522               | 522                      | 174                   | 19058.76              | 9.86 | NYAPKQTGNSPGIGH<br>NYTPNQTGNSPGIGH<br>SIDDIKAGHSPGIGH |
| <i>SICEP6</i>  | Solyc02g090610 | ch02:50203465-50203768 forward  | 303                   | 303               | 303                      | 101                   | 10818.55              | 9.6  | PPPGHPDGHSPGIGH                                       |
| <i>SICEP7</i>  | Solyc02g092890 | ch02:51889669-51889942 forward  | 273                   | 273               | 273                      | 91                    | 9800.43               | 8.71 | YLGIKNSGPSPGEGH                                       |
| <i>SICEP8</i>  | Solyc03g044180 | ch03:7705647-7705914 forward    | 267                   | 267               | 267                      | 89                    | 9605.11               | 9.6  | TLGDIKDGSPGVGH<br>TLGGIKAGPSPGEGH                     |
| <i>SICEP9</i>  | Solyc03g044530 | ch03:8919360-8919723 reverse    | 363                   | 363               | 363                      | 121                   | 13256.43              | 6.58 | DFGPTGPGHSPGIGH                                       |
| <i>SICEP10</i> | Solyc03g044560 | ch03:9418566-9418884 reverse    | 318                   | 318               | 318                      | 106                   | 12094.83              | 9.83 | VSFDNLKDHSPGIGH                                       |
| <i>SICEP11</i> | Solyc03g044580 | ch03:9458192-9458528 forward    | 336                   | 336               | 336                      | 112                   | 12331.02              | 9.05 | GFSPYGRGHSPGIGH                                       |
| <i>SICEP12</i> | Solyc07g062320 | ch07:64931818-64932058 reverse  | 240                   | 240               | 240                      | 80                    | 8063.94               | 9.16 | VYGNLNI GPSPGEGH<br>VYGNLNTGPSPGEGH                   |
| <i>SICEP13</i> | Solyc07g062330 | ch07:64935912-64936116 reverse  | 204                   | 204               | 204                      | 68                    | 7365.5                | 6.7  | IYGNLNTGPSPGEGH                                       |
| <i>SICEP14</i> | Solyc07g062340 | ch07:64941677-64941929 reverse  | 252                   | 252               | 252                      | 84                    | 8952.31               | 7.91 | IYGNLNTKPSPGEGH                                       |
| <i>SICEP15</i> | Solyc07g062350 | ch07:64952870-64953239 reverse  | 369                   | 369               | 369                      | 123                   | 12777.46              | 7.85 | IYGNLNTGPSPGVGH<br>VYGNLNTGPSPGEGH<br>VYGNLNTGPSPGEGH |

|                |                |                                |     |     |     |     |          |      |                                                                        |
|----------------|----------------|--------------------------------|-----|-----|-----|-----|----------|------|------------------------------------------------------------------------|
| <i>SICEP16</i> | Solyc07g062360 | ch07:64962982-64963669 reverse | 687 | 687 | 687 | 229 | 23619.59 | 9.92 | VYGNLKYDPSRGAGH<br>VYHNLRSPSPGAGH<br>VYGNLRSGPSPGAGH<br>VYGNLRSPSPGAGH |
| <i>SICEP17</i> | Solyc07g062370 | ch07:64980820-64981756 reverse | 936 | 936 | 936 | 312 | 32878.64 | 9.65 | VKSESHSSPSPGEGH                                                        |

---

**Table S2. Predication of N-terminal signal peptide of SICEP proteins**

| Protein | Position in sequence | Sequence           | Probability | Predictated by |
|---------|----------------------|--------------------|-------------|----------------|
| SICEP1  | 29-30                | ATE <b>AR</b> PFI  | 0.6155      | SignalP 5.0    |
| SICEP2  | 24-25                | IVE <b>SI</b> EGR  | 0.5206      | SignalP 5.0    |
| SICEP3  | 24-25                | CIQ <b>CR</b> PIT  | 0.8301      | SignalP 5.0    |
| SICEP4  | 23-24                | FSQ <b>GR</b> NLA  | 0.5008      | SignalP 5.0    |
| SICEP5  | 52-53                | FAE <b>GR</b> QLK  |             | Signal-CF      |
| SICEP6  | 27-28                | SIE <b>GR</b> HLLK | 0.3919      | SignalP 5.0    |
| SICEP7  | 28-29                | ASE <b>AR</b> PLD  | 0.4857      | SignalP 5.0    |
| SICEP8  | 24-25                | ASE <b>AR</b> PLN  | 0.7908      | SignalP 5.0    |
| SICEP9  | 31-32                | CVE <b>A</b> IRHL  |             | Signal-CF      |
| SICEP10 | 27-28                | FTE <b>GR</b> QLN  | 0.5818      | SignalP 5.0    |
| SICEP11 | 26-27                | TIQ <b>SI</b> EGR  | 0.3915      | SignalP 5.0    |
| SICEP12 |                      |                    |             |                |
| SICEP13 | 23-24                | CFE <b>AR</b> TQL  | 0.5082      | SignalP 5.0    |
| SICEP14 | 23-24                | CFE <b>AR</b> TQL  | 0.5064      | SignalP 5.0    |
| SICEP15 | 23-24                | CFE <b>AR</b> TQL  | 0.4620      | SignalP 5.0    |
| SICEP16 | 23-24                | CFE <b>AK</b> TQS  | 0.4772      | SignalP 5.0    |
| SICEP17 | 21-22                | SFE <b>AR</b> KQF  | 0.7030      | SignalP 5.0    |

|          |                               |
|----------|-------------------------------|
| SICEP1   | NV V V K N S G P S P G I G H  |
| SICEP2   | P S P G H V D G H S P G I G H |
| SICEP3   | L T E A K N S G P S P G E G H |
| SICEP4   | V D A F S S P G H S P G I G H |
| SICEP5a  | N Y A P K Q T G N S P G I G H |
| SICEP5b  | N Y T P N Q T G N S P G I G H |
| SICEP5c  | S I D D I K A G H S P G I G H |
| SICEP6   | P P P G H P D G H S P G I G H |
| SICEP7   | Y L G I K N S G P S P G E G H |
| SICEP8a  | T L G D I K D G P S P G V G H |
| SICEP8b  | T L G G I K A G P S P G E G H |
| SICEP9   | D F G P T G P G H S P G I G H |
| SICEP10  | V S F D N L K D H S P G I G H |
| SICEP11  | G F S P Y G R G H S P G I G H |
| SICEP12a | V Y G N L N I G P S P G E G H |
| SICEP12b | V Y G N L N T G P S P G E G H |
| SICEP13  | I Y G N L N T G P S P G E G H |
| SICEP14  | I Y G N L N T K P S P G E G H |
| SICEP15a | I Y G N L N T G P S P G V G H |
| SICEP15b | V Y G N L N T G P S P G E G H |
| SICEP15c | V Y G N L N T G P S P G E G H |
| SICEP16a | V Y G N L N T G P S P G E G H |
| SICEP16b | V Y H N L R S V P S P G A G H |
| SICEP16c | V Y G N L R S G P S P G A G H |
| SICEP16d | V Y G N L R S V P S P G A G H |
| SICEP17  | V K S E S H S S P S P G E G H |
| AtCEP1   | D F R P T N P G N S P G V G H |
| AtCEP2a  | E F A P T N P E D S L G I G H |
| AtCEP2b  | D F A P T N P G D S P G I R H |
| AtCEP3   | T F R P T E P G H S P G I G H |
| AtCEP4   | A F R P T H Q G P S Q G I G H |
| AtCEP5   | D F R P T T P G H S P G I G H |
| AtCEP6a  | D F G P T S P G N S P G I G H |
| AtCEP6b  | D F E P T T P G H S P G V G H |
| AtCEP7   | A F R P T N P G N S P G I G H |
| AtCEP8   | E F R P T T P G N S P G I G H |
| AtCEP9a  | D F V P T S P G N S P G V G H |
| AtCEP9b  | D F A P T S P G H S P G V G H |
| AtCEP9c  | D F A P T S P G N S P G I G H |
| AtCEP9d  | D F A P T E E I R L Q K M N G |
| AtCEP9e  | D F A P T T P G N S P G M G H |
| AtCEP9f  | D F K P T T P G H S P G V G H |
| AtCEP10a | D F A P T N P G H N S G I G H |
| AtCEP10b | D F A P T N P G H S P G I G H |
| AtCEP10c | D F A P T N P G N S P G I R H |
| AtCEP11  | A F R S T E P G H S P G V G H |
| AtCEP12  | A F R P T G Q G P S Q G I G H |
| AtCEP13  | I Y R R L E S V P S P G V G H |
| AtCEP14  | V D R Y L R S V P S P G V G H |
| AtCEP15  | I Y R R Q G D V P S P G I G H |

**Figure S1.** Alignment of CEP motifs in tomato and *Arabidopsis*.

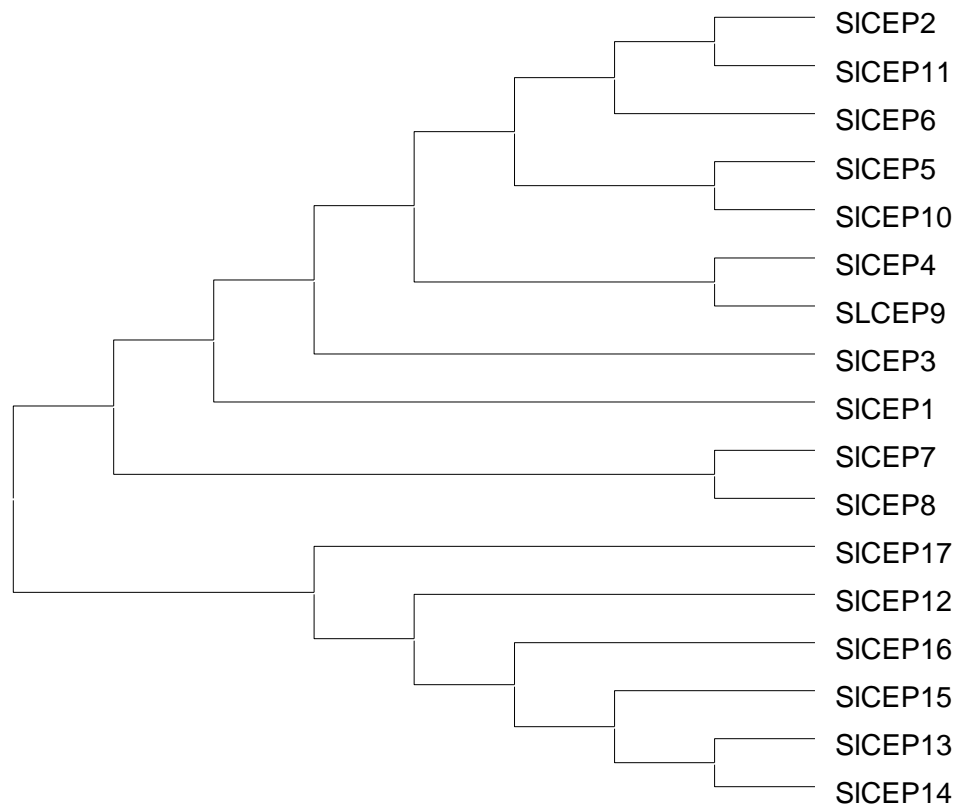

**Figure S2.** Phylogenetic tree of full-length SICEP proteins. The phylogenetic tree was build based on the full-length sequences of SICEP proteins with 1000 bootstrap replicates.

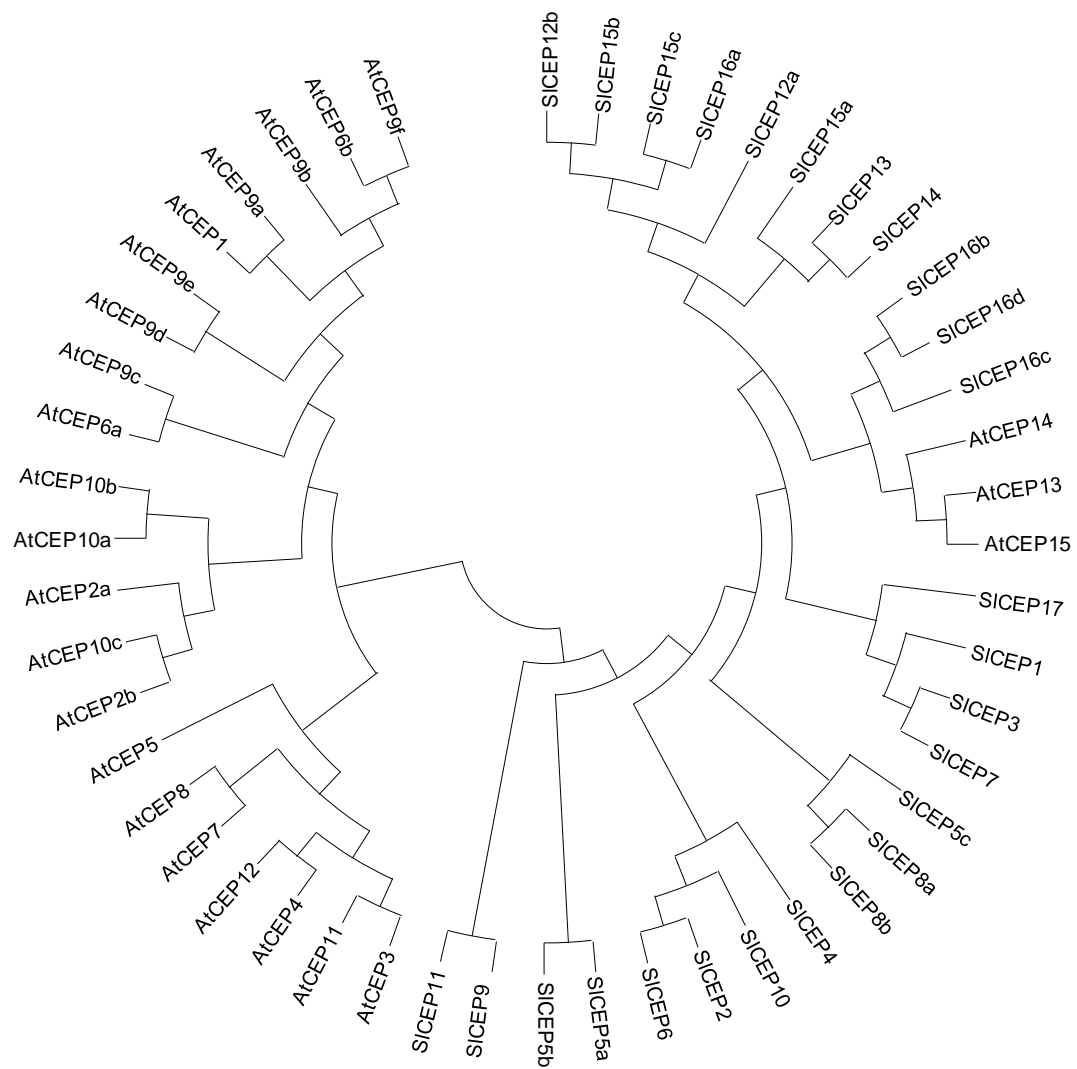

**Figure S3.** Phylogenetic tree of AtCEP and SICEP proteins based on the CEP motifs. The phylogenetic tree was build based on the CEP motifs of SICEP and AtCEP proteins with 1000 bootstrap replicates.

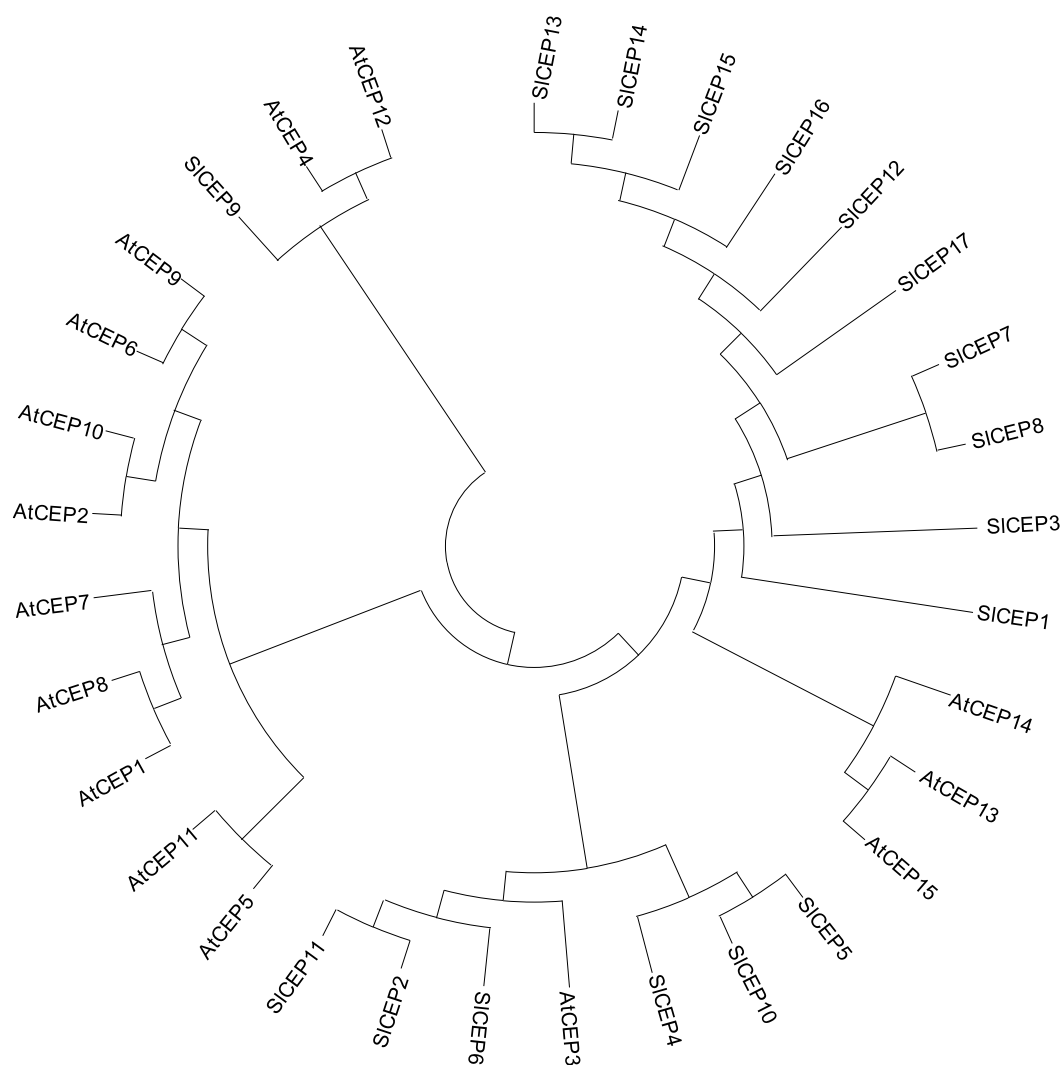

**Figure S4.** Phylogenetic tree of full-length AtCEP and SlCEP proteins. The phylogenetic tree was build based on the full length of SlCEP and AtCEP proteins with 1000 bootstrap replicates.

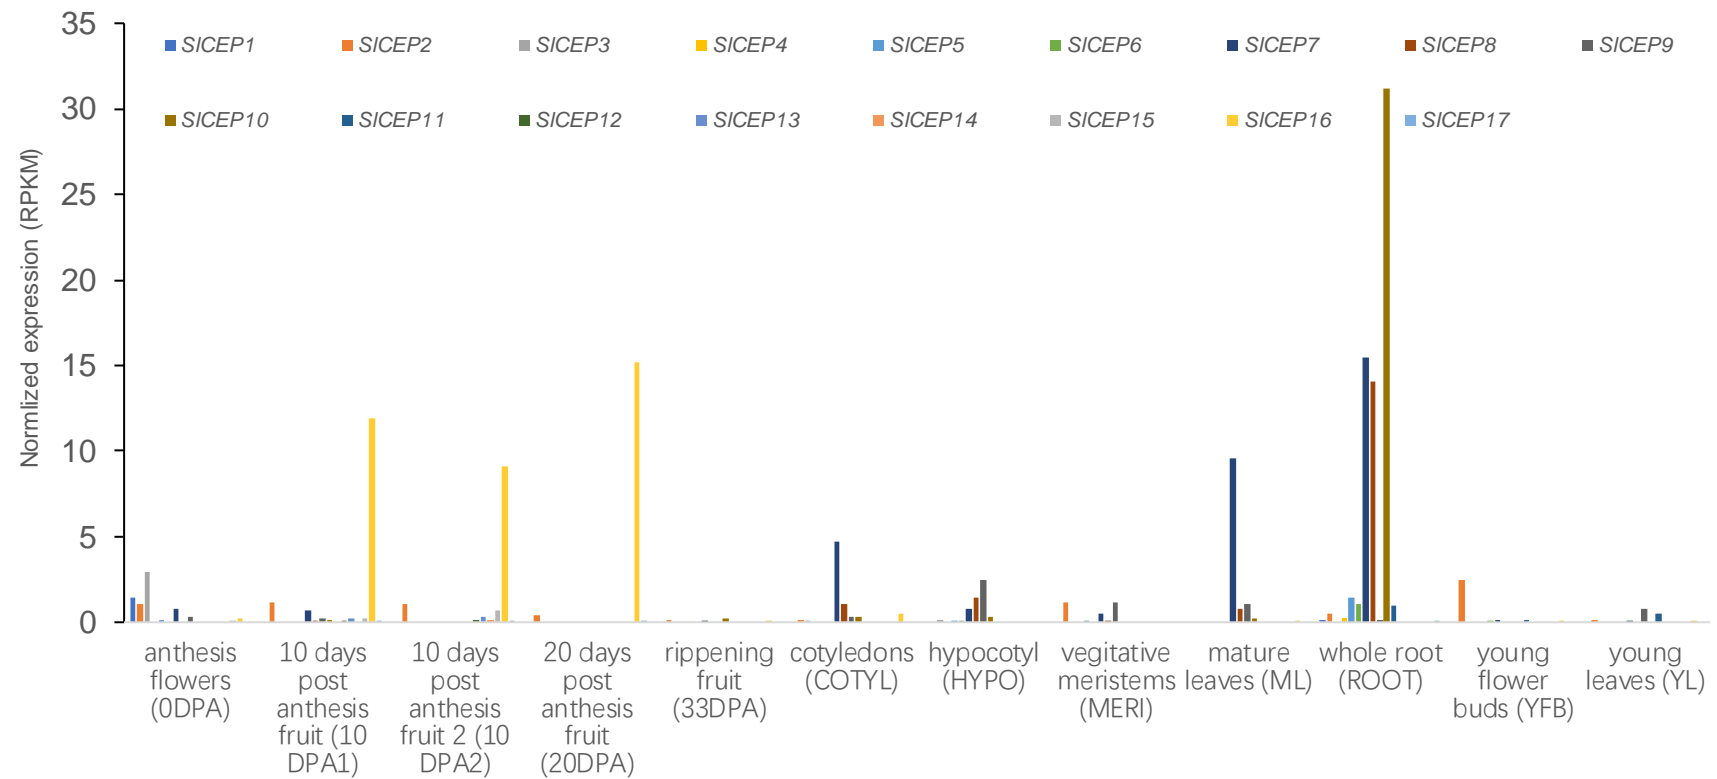

**Figure S5.** Expression levels of *SICEPs* in tomato tissues. The expression data was extracted from a transcriptome analysis of various tissues in wild species *S. pimpinellifolium*, LA1589.



**Table S3 Primers used for qRT-PCR analysis**

|                |                       |                 |                       |
|----------------|-----------------------|-----------------|-----------------------|
| <i>SICEP1F</i> | ATGGCTCGAGTTATCATTCA  | <i>SICEP10F</i> | TATGCATTTACTTTCCTTCT  |
| <i>SICEP1R</i> | AGGACCGGAGTTTTTCACCA  | <i>SICEP10R</i> | TTCTTCATACCTTTGCTTTG  |
| <i>SICEP2F</i> | TCCTTGCTATCTTTGTCCTT  | <i>SICEP11F</i> | TTCAATCTATCGAGGGACGA  |
| <i>SICEP2R</i> | CATTGTTTTGAACAGTGAAT  | <i>SICEP11R</i> | CGTCAAATGTTCCCTTCTTT  |
| <i>SICEP3F</i> | ATGAAAATGGGCACAACAAA  | <i>SICEP12F</i> | ATGTTTATGGCAACTTGAAT  |
| <i>SICEP3R</i> | AAGTTGATGAACTTTCATGC  | <i>SICEP12R</i> | AAACATGACCCATTCTAGGA  |
| <i>SICEP4F</i> | ATGGCTAAGTTTTATACCGT  | <i>SICEP13F</i> | TATGTTAGTTTTTCGTTGCAC |
| <i>SICEP4R</i> | TTTATCTTCCTTTTCTTCGA  | <i>SICEP13R</i> | TGTCCTTCACCAGGACTAGG  |
| <i>SICEP5F</i> | GCTGAGGGAAGACAACCTGAA | <i>SICEP14F</i> | ACTATGTTAGTTTTTCGTTGC |
| <i>SICEP5R</i> | TCCGGTTTGCTTTGGTGCAT  | <i>SICEP14R</i> | TCCTTCTCCAGGACTAGGTT  |
| <i>SICEP6F</i> | AGGGAAGACATTTGAAGTTG  | <i>SICEP15F</i> | TTGCACCATGTTTTGAAGCA  |
| <i>SICEP6R</i> | TCTGAACCAGACTAGTTGGC  | <i>SICEP15R</i> | GAGGTGGGCCAAAATGTCCG  |
| <i>SICEP7F</i> | GTAAATGCAAGAGCTTCATG  | <i>SICEP16F</i> | CTTGCTTCTTCGGCCCCATA  |
| <i>SICEP7R</i> | TAAGGCCATTCTTGATAGCA  | <i>SICEP16R</i> | ACCAGCTCCAATACTAAGGC  |
| <i>SICEP8F</i> | ATGGTGAGATTTTCTTATTT  | <i>SICEP17F</i> | AATTTAGCAAAGAAGGTAAC  |
| <i>SICEP8R</i> | CTTAATATCACCCAATGTTA  | <i>SICEP17R</i> | GACTCGAGACTGATTTCAAA  |
| <i>SICEP9F</i> | ATGGTTATTGTAACAAACAC  | <i>SlActinF</i> | CTCAGTCAGGAGAACAGGGT  |
| <i>SICEP9R</i> | TGATACGAAATTTCCACAC   | <i>SlActinR</i> | GCCTCCAGCCTTGTTGTAAA  |
